# Supplementary material for: Assessment of the Macrophage Scavenger Receptor CD163 in Mediating Glaesserella parasuis Infection of Host Cells
Source: MDPI journal article supplement (doi:10.3390/vetsci10030235), 2023-03-21
Supplement: s1 [file s1]

**Supplementary Table S1. Names of genes and primers used for Q-PCR analysis.**

| Gene           | Accession number | Primers (5'-3')                                          | Product size (bp) | Annealing Temperature (°C) |
|----------------|------------------|----------------------------------------------------------|-------------------|----------------------------|
| RPL32          | NM_001001636.1   | F: CGGAAGTTTCTGGTACACAATGTAA<br>R: TGGAAGAGACGTTGTGAGCAA | 94                | 58–60                      |
| $\beta$ -actin | XM_027429179.2   | F: CGGAAGTTTCTGGTACACAATGTAA<br>R: TGGAAGAGACGTTGTGAGCAA | 94                | 59                         |
| IL-4           | XM_003498480.2   | F: CCACGGAGAAAGACCTCATCTG<br>R: GGGTCACCTCATGTTGGAAATAAA | 72                | 60                         |
| IL-6           | XM_027429568.2   | F: AGTCGGAGGTTTGGTTACACA<br>R: TTAGGGTTTTGGTGGTGCTCT     | 299               | 59                         |
| IL-10          | XM_027417709.2   | F: CGAGAGCTGAGAACTGCCTT<br>R: CCTGGGGCATCACTTCTACC       | 169               | 60                         |
| TGF- $\beta$   | XM_027402047.2   | F: GACCTGCCCTGAAAAAGAAGT<br>R: ACTCATCTCTTCTGGCCAAGC     | 148               | 60                         |
| INF- $\gamma$  | XM_035439009.1   | F: ACACGTTGCTTCTTGGCTTT<br>R: TCCATTCCCAACATCTTCT        | 264               | 58                         |
